# Supplementary material for: Controlled Synthesis of Poly(pentafluorostyrene-ran-methyl methacrylate) Copolymers by Nitroxide Mediated Polymerization and Their Use as Dielectric Layers in Organic Thin-film Transistors
Source: PubMed Central journal article supplement (PMC7361672; doi:10.3390/polym12061231), 2020-05-29
Supplement: polymers-12-01231-s001.pdf [file polymers-12-01231-s001.pdf]

# **Controlled synthesis of poly(pentafluorostyrene-ran-methyl methacrylate) copolymers by nitroxide mediated polymerization and their use as dielectric layers in organic thin-film transistors**

Alexander J. Peltekoff, Mathieu N. Tousignant, Victoria E. Hillier, Owen A. Melville, Benoît H. Lessard\*.

Department of Chemical & Biological Engineering, University of Ottawa, 161 Louis Pasteur, Ottawa, ON, Canada K1N 6N5

Corresponding author: [benoit.lessard@uottawa.ca](mailto:benoit.lessard@uottawa.ca)

## **SUPPORTING INFORMATION**

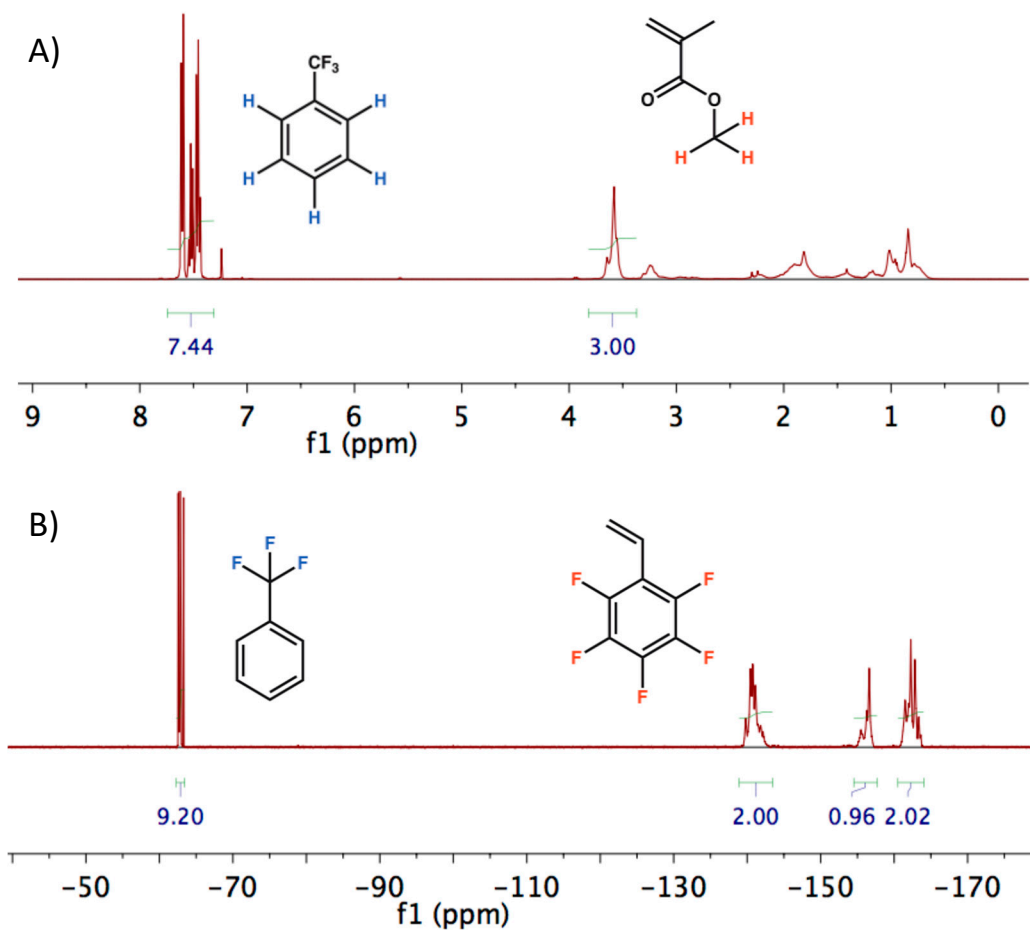

**Figure S1.** A)  $^1\text{H}$  NMR and B)  $^{19}\text{F}$  NMR spectrum of the final copolymer PFS/MMA 80/20 with  $\alpha$ - $\alpha$ - $\alpha$ -trifluorotoluene marker MMA to TFT ratio of 7.44 : 3.00 and PFS to TFT ratio of 9.20 : 2.0.

The following is a derivation of the equation used to determine the molar composition of the copolymers using the same NMR solution and using TFT as a standard for NMR comparison. (Figure S1).

**$^{19}\text{F}$  NMR:**

$$TFT = \frac{1}{3}\delta_{-63} \quad ; \quad PFS = \frac{1}{2}\delta_{-140} \quad ; \quad \frac{PFS}{TFT} = \frac{\left(\frac{1}{2}\delta_{-140}\right)}{\left(\frac{1}{3}\delta_{-63}\right)}$$

**$^1\text{H}$  NMR:**

$$MMA = \frac{1}{3}\delta_{3.6} \quad ; \quad TFT = \frac{1}{5}\delta_{7.5} \quad ; \quad \frac{TFT}{MMA} = \frac{\left(\frac{1}{5}\delta_{7.5}\right)}{\left(\frac{1}{3}\delta_{3.6}\right)}$$

$$\frac{PFS}{MMA} = \frac{PFS}{TFT} \times \frac{TFT}{MMA} = \frac{\left(\frac{1}{2}\delta_{-140}\right)\left(\frac{1}{5}\delta_{7.5}\right)}{\left(\frac{1}{3}\delta_{-63}\right)\left(\frac{1}{3}\delta_{3.6}\right)}$$

$$F_{PFS} = \frac{PFS}{PFS + MMA} = \frac{\frac{PFS}{MMA}}{\frac{PFS}{MMA} + 1} = \frac{\frac{\left(\frac{1}{2}\delta_{-140}\right)\left(\frac{1}{5}\delta_{7.5}\right)}{\left(\frac{1}{3}\delta_{-63}\right)\left(\frac{1}{3}\delta_{3.6}\right)}}{\frac{\left(\frac{1}{2}\delta_{-140}\right)\left(\frac{1}{5}\delta_{7.5}\right)}{\left(\frac{1}{3}\delta_{-63}\right)\left(\frac{1}{3}\delta_{3.6}\right)} + 1}$$

$$F_{PFS} = \frac{\left(\frac{1}{2}\delta_{-140}\right)\left(\frac{1}{5}\delta_{7.5}\right)}{\left(\frac{1}{2}\delta_{-140}\right)\left(\frac{1}{5}\delta_{7.5}\right) + \left(\frac{1}{3}\delta_{-63}\right)\left(\frac{1}{3}\delta_{3.6}\right)}$$

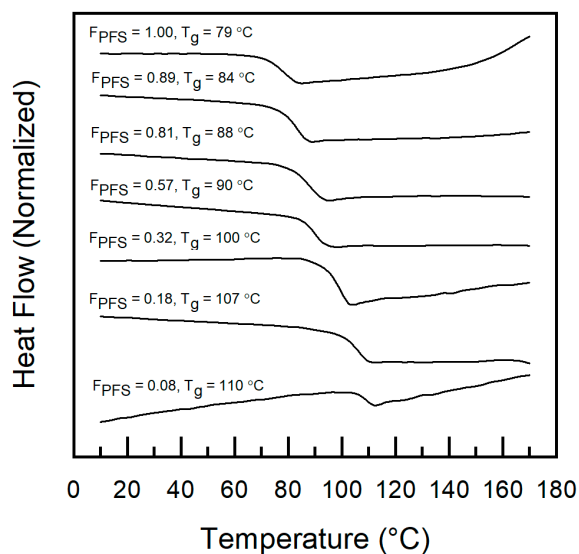

**Figure S2.** DSC exothermic thermograms of PFS/MMA copolymers

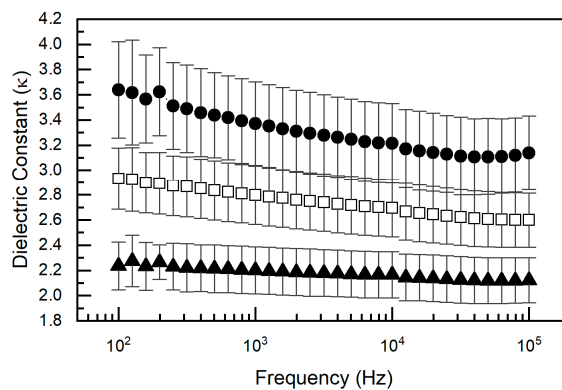

**Figure S3.** a) Dielectric constant versus frequency from  $10^2 - 10^5$  Hz obtained by impedance spectroscopy on MIM capacitors utilizing PFS/MMA copolymers as insulating layer of compositions:  $F_{PFS} = 0.08$  (closed circles),  $F_{PFS} = 0.57$  (open squares), and  $F_{PFS} = 0.81$  (closed triangles).

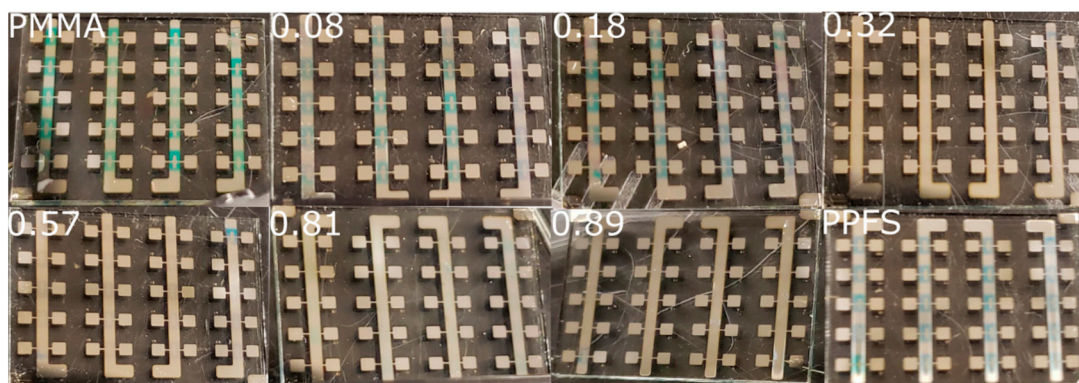

**Figure S4.** PFS/MMA copolymer OTFTs CuPc Visibility at varying PFS content.

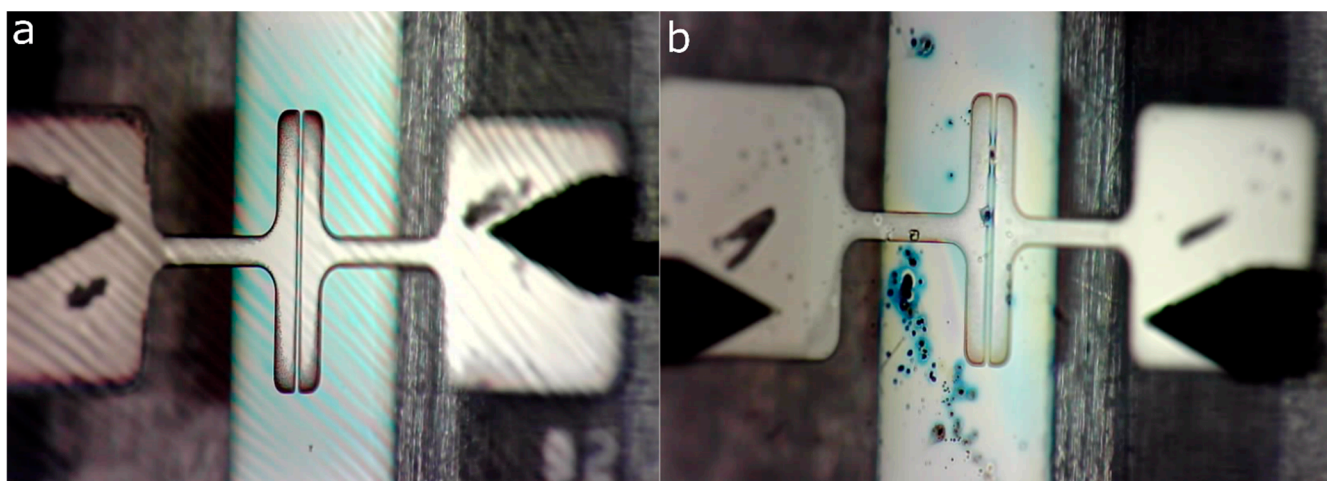

**Figure S5.** Microscope images of CuPc deposited on a). PFS 8 and b). PFS 81.

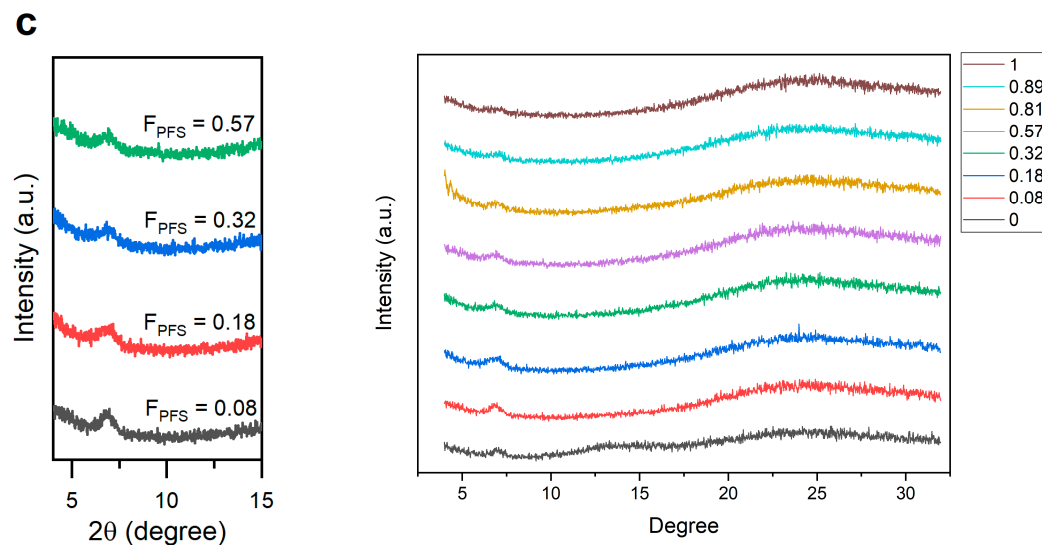

**Figure S6.** X-ray diffraction pattern performed on CuPc films deposited on PFS/MMA underlying films of varying compositions.
